# Supplementary material for: Gene drive for population genetic control: non-functional resistance and parental effects
Source: PubMed Central journal article supplement (PMC6842858; doi:10.1098/rspb.2019.1586), 2019-10-30
Supplement: rspb20191586supp3.pdf [file rspb20191586supp3.pdf]

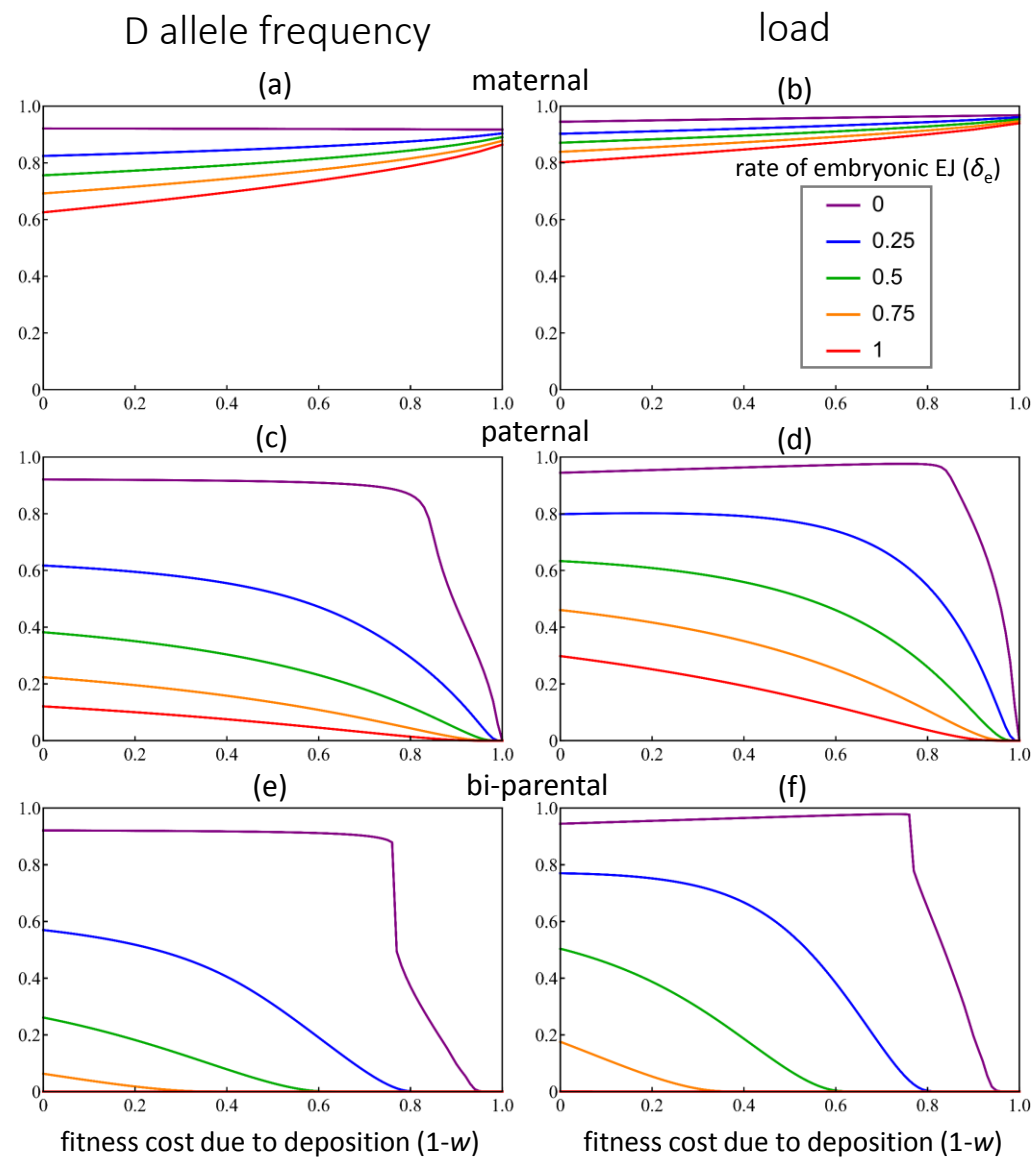

**Fig. S2.** Equilibrium drive allele frequency (a,c,e) and load (b,d,f) (after 200 generations) when there are parental effects on both fitness and gene transmission, as a function of combined parental effects of reduction in W/D female heterozygote fitness (y-axis) and of rate of resistance from embryonic EJ (different coloured lines). In (a & b), effects are maternal only ( $w^{10} = w$ ,  $w^{01} = 1$ ,  $w^{11} = w$ ;  $\delta_e^{10} = \delta_e$ ,  $\delta_e^{01} = 1$ ,  $\delta_e^{11} = \delta_e$ ), in (c & d) paternal only ( $w^{10} = 1$ ,  $w^{01} = w$ ,  $w^{11} = w$ ;  $\delta_e^{10} = 1$ ,  $\delta_e^{01} = \delta_e$ ,  $\delta_e^{11} = \delta_e$ ), and in (e & f) effects are from both parents assuming  $w^{11} = w$  and  $\delta_e^{11} = \delta_e$ . The purple line in each plot ( $\delta_e = 0$ ) is the same as the corresponding line in Fig. 4 of the main text.
